# Supplementary material
Source: publisher figshare collection journal article supplement (https://acs.figshare.com/ndownloader/files/4766800)
Supplement: Supplementary file 1 [file 4766800]

**Table 1.** Precision and Accuracy Data of 4-Methylspinaceamine Determination in Food Sample

| 4-methylspinaceamine<br>added<br>(nmol/mL) | 4-methylspinaceamine<br>found<br>(nmol/mL) | Precision<br>C. V. (%) | Accuracy<br>MRE <sup>b)</sup> (%) |
|--------------------------------------------|--------------------------------------------|------------------------|-----------------------------------|
| 0                                          | n. d. <sup>a)</sup>                        |                        |                                   |
| 2                                          | 1.99                                       | 1.65                   | -0.5                              |
| 6                                          | 6.10                                       | 2.43                   | 1.67                              |
| 12                                         | 12.07                                      | 1.60                   | 0.58                              |

4-methylspinaceamine was added to the analytical samples (soy sauce D, 0.20 mL/mL, n = 4). <sup>a)</sup>Not detected. <sup>b)</sup>MRE = (concentration found – concentration added) / concentration added x 100.

**Table 2.** Precision and Accuracy Data of 1,4-Dimethylspinaceamine Determination in Human Urine

| 1,4-dimethylspinaceamine<br>added<br>(nmol/mL) | 1,4-dimethylspinaceamine<br>found<br>(nmol/mL) | Precision<br>C. V. (%) | Accuracy<br>MRE <sup>a)</sup> (%) |
|------------------------------------------------|------------------------------------------------|------------------------|-----------------------------------|
| 0                                              | n. d.                                          |                        |                                   |
| 0.2                                            | 0.211                                          | 7.35                   | 5.68                              |
| 1                                              | 1.04                                           | 2.01                   | 3.8                               |
| 2                                              | 2.02                                           | 4.04                   | 0.82                              |

1,4-dimethylspinaceamine was added to urine samples (n = 4). <sup>a)</sup>MRE = (concentration found – concentration added) / concentration added x 100.

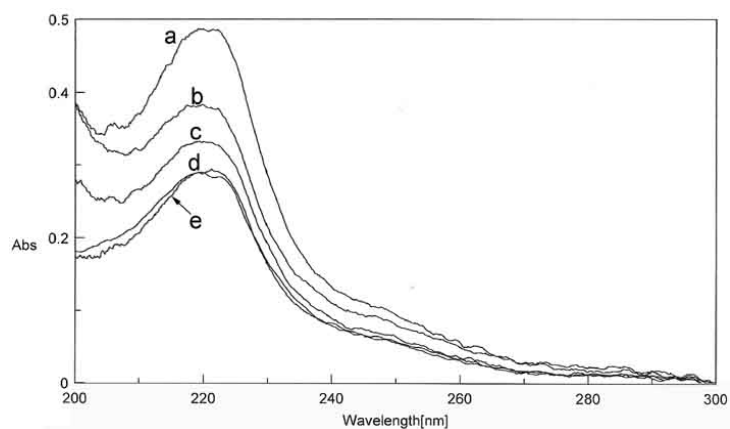

**Figure 1.** UV absorption spectra of (a) authentic **1**; HPLC fraction collected from (b) fish sauce sample; (c) cheese sample; (d) soy sauce sample; (e) shao hsing wine sample.

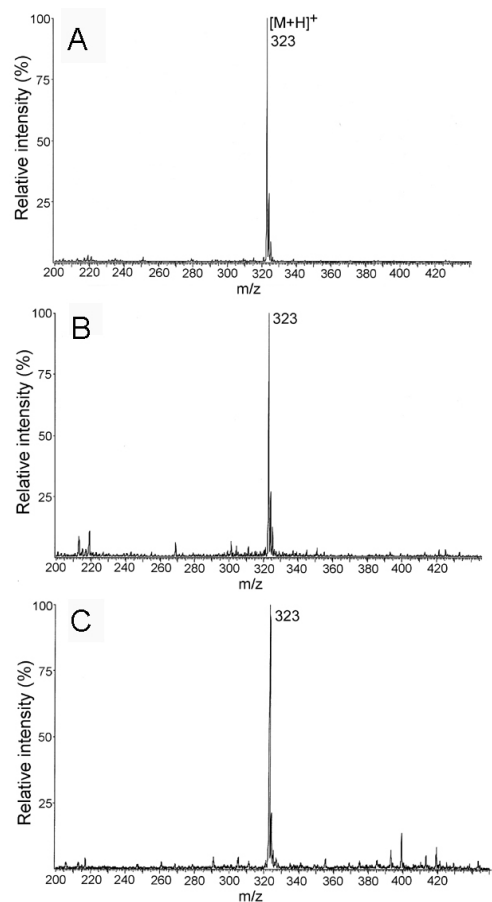

**Figure 2.** IS-MS spectra of (A) authentic **1**; HPLC fraction collected from (B) soy sauce sample; (C) soy sauce sample spiked with acetaldehyde-d<sub>4</sub> (2 μmol).

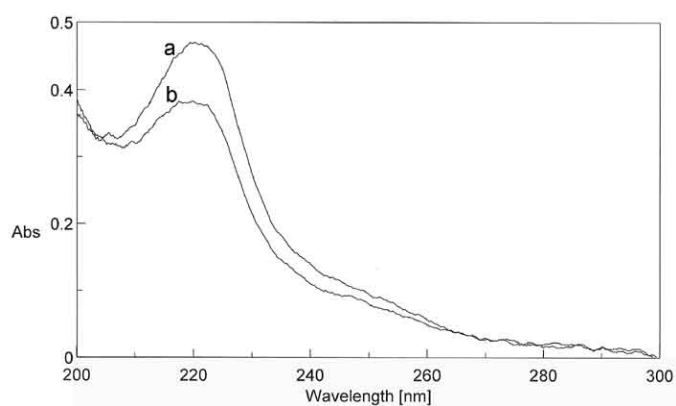

**Figure 3.** UV absorption spectra of (a) authentic **2**; (b) HPLC fraction collected from urine sample after ingestion of 4-methylspinaceamine-containing cheese.

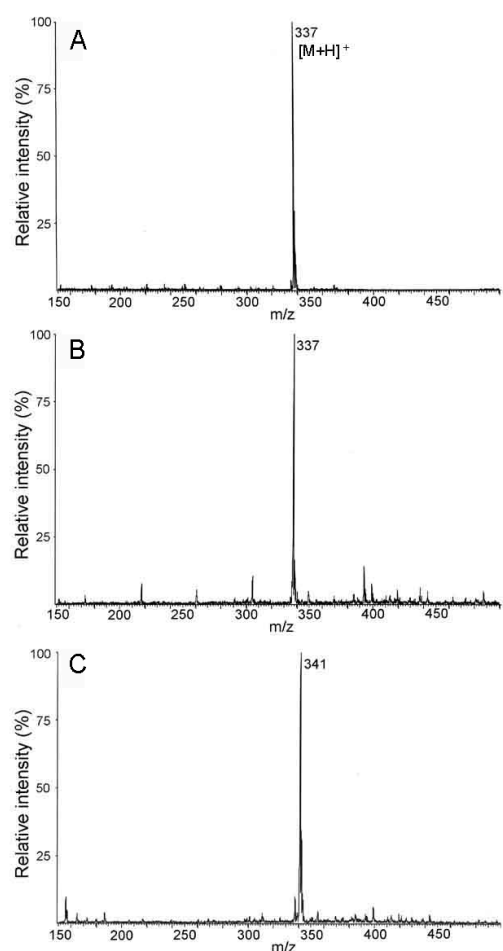

**Figure 4.** IS-MS spectra of (A) authentic **2**; HPLC fraction collected from urine sample (B) 2 h after ingestion of 4-methylspinaceamine-containing cheese; (C) 2 h after administration of 4-methylspinaceamine- $d_4$  (1  $\mu$ mol).
